# Supplementary material for: Bromide ion binding by a dinuclear gold(i) N-heterocyclic carbene complex: a spectrofluorescence and X-ray absorption spectroscopic study
Source: Royal Society of Chemistry journal article supplement (doi:10.1039/c2dt31817b), 2012-11-09
Supplement: c2dt31817b.pdf [file c2dt31817b.pdf]

# **Bromide ion binding by a dinuclear gold(I) *N*-heterocyclic carbene complex: A spectrofluorescence and X-ray absorption spectroscopic study**

**Louise E. Wedlock, Jade B. Aitken, Susan J. Berners-Price and Peter J. Barnard**

## **Electronic Supplementary Information**

### Contents

- 1. Table S1:** Constraints and restraints used in the MS EXAFS analysis of **1**.(PF<sub>6</sub>)<sub>2</sub> in DMSO.
- 2.** XFit Data Analysis – Determinacy, Goodness-of-Fit and Monte-Carlo Error Analysis
- 3. Table S2:** Paths and importance factors from the analysis using MS model (Table 1), for the MS refinement of the EXAFS of **1**.(PF<sub>6</sub>)<sub>2</sub>.
- 4.** <sup>1</sup>H NMR spectrum of [**1**](PF<sub>6</sub>)<sub>2</sub> in d<sub>6</sub>-DMSO

**Table S1** Constraints and restraints used in the MS EXAFS analysis of **1**.(PF<sub>6</sub>)<sub>2</sub> in DMSO.

|                                                        |                                                                                                                                                                                                                                                                                                                                                                                                                                                                                                                                                                                               |
|--------------------------------------------------------|-----------------------------------------------------------------------------------------------------------------------------------------------------------------------------------------------------------------------------------------------------------------------------------------------------------------------------------------------------------------------------------------------------------------------------------------------------------------------------------------------------------------------------------------------------------------------------------------------|
| Mean displacement factor constraints (Å <sup>2</sup> ) | $\sigma^2_{(C1)} = \sigma^2_{(C2)}$<br>$\sigma^2_{(N4)} = \sigma^2_{(N5)} = \sigma^2_{(N6)} = \sigma^2_{(N7)}$<br>$\sigma^2_{(C8)} = \sigma^2_{(C9)} = \sigma^2_{(C10)} = \sigma^2_{(C11)}$                                                                                                                                                                                                                                                                                                                                                                                                   |
| Mean displacement factor restraints (Å <sup>2</sup> )  | $\sigma^2_i > 0.0005 \{0.0001\}$ where <i>i</i> is all shells<br>$\sigma^2_i < 0.02 \{0.01\}$ where <i>i</i> is all shells                                                                                                                                                                                                                                                                                                                                                                                                                                                                    |
| Bond length restraints (Å)                             | C(1) – Au(0) $\sim= 2.03 \{0.05\}$<br>C(2) – Au(0) $\sim= 2.03 \{0.05\}$<br>C(1) – N(5) $\sim= 1.38 \{0.05\}$<br>C(5) – C(9) $\sim= 1.40 \{0.05\}$<br>C(8) – C(9) $\sim= 1.35 \{0.05\}$<br>C(8) – N(4) $\sim= 1.40 \{0.05\}$<br>N(4) – C(1) $\sim= 1.38 \{0.05\}$<br>C(2) – N(6) $\sim= 1.38 \{0.05\}$<br>N(6) – C(11) $\sim= 1.40 \{0.05\}$<br>C(10) – C(11) $\sim= 1.35 \{0.05\}$<br>C(10) – N(7) $\sim= 1.40 \{0.05\}$<br>N(7) – C(2) $\sim= 1.38 \{0.05\}$                                                                                                                                |
| Bond angle restraints (°)                              | Au(0) – C(1) – N(5) $\sim= 127 \{5\}$<br>Au(0) – C(1) – N(4) $\sim= 127 \{5\}$<br>C(1) – N(5) – C(9) $\sim= 110 \{5\}$<br>N(5) – C(1) – N(4) $\sim= 106 \{5\}$<br>N(5) – C(9) – C(8) $\sim= 107 \{5\}$<br>C(9) – C(8) – N(4) $\sim= 107 \{5\}$<br>C(8) – N(4) – C(1) $\sim= 110 \{5\}$<br>Au(0) – C(2) – N(6) $\sim= 127 \{5\}$<br>Au(0) – C(2) – N(6) $\sim= 127 \{5\}$<br>C(2) – N(6) – C(11) – N(6) $\sim= 110 \{5\}$<br>N(6) – C(2) – N(7) $\sim= 106 \{5\}$<br>N(6) – C(11) – C(10) $\sim= 107 \{5\}$<br>C(11) – C(10) – N(7) $\sim= 107 \{5\}$<br>C(10) – N(7) – C(2) $\sim= 110 \{5\}$ |
| Symmetry restraints                                    | $z_i = 0$ , where <i>i</i> is all shells except Au(3)<br>$x_{Au(3)} = 0$<br>$y_{Au(3)} = 0$<br>$x_{N(4)} = x_{N(5)}$<br>$x_{N(6)} = x_{N(7)}$<br>$x_{C(8)} = x_{C(9)}$<br>$x_{C(10)} = x_{C(11)}$<br>$x_{C(1)} = -x_{C(2)}$<br>$x_{N(4)} = -x_{N(7)}$<br>$x_{N(5)} = -x_{N(6)}$<br>$x_{C(8)} = -x_{C(10)}$<br>$x_{C(9)} = -x_{C(11)}$<br>$y_{C(1)} = y_{C(2)}$<br>$y_{N(4)} = -y_{N(5)}$<br>$y_{N(6)} = -y_{N(7)}$<br>$y_{C(8)} = -y_{C(9)}$<br>$y_{C(10)} = -y_{C(11)}$<br>$y_{N(6)} = y_{N(5)}$<br>$y_{N(7)} = y_{N(4)}$<br>$y_{C(10)} = y_{C(8)}$<br>$y_{C(11)} = y_{C(9)}$                |
| Occupancy ( <i>N</i> ) restraints                      | $N_i = 1$ , where <i>i</i> is all shells                                                                                                                                                                                                                                                                                                                                                                                                                                                                                                                                                      |

## XFit Data Analysis – Determinacy, Goodness-of-Fit and Monte-Carlo Error Analysis

### Determinacy

The number of parameters being fitted,  $p$ , compared to the number of independent information data points (independent points in the EXAFS plus the number of independent structural parameters),  $N_i$ , was calculated to give the degree of determinacy  $N_i/p$ . If this ratio is  $< 1$ , then the model is considered to be underdetermined and a unique fit is not possible. In all cases the ratio was  $> 1$  and, hence, the models were overdetermined. The value of  $N_i$  is given by:<sup>1</sup>

$$N_i = 2(\Delta r)(\Delta k)/\pi + \Sigma[D(N-2)+1] \quad (1)$$

where  $D$  is the number of dimensions in which the refinement takes place and  $N$  is the number of atoms in the unit.<sup>2</sup>

### Goodness-of-Fit (Residual)

The method of determining the goodness of fit was through an  $R$  value where  $R$  is given by:

$$R = (\chi^2/\chi^2_{\text{calculated}=0})^{1/2} \quad (2)$$

where  $\chi^2$  is the quantity minimized during the refinement and  $\chi^2_{\text{calculated}=0}$  is the value of  $\chi^2$  when the calculated EXAFS is uniformly 0.<sup>3</sup> Residual  $R$  values of  $\leq 20\%$  were considered reasonable for MS models, and relatively high ( $>20\%$ ) values of  $R$  are explained by the exclusion of multiple-scattering contributions on the SS models.<sup>2, 4</sup>

### Monte-Carlo Error Analysis

Monte Carlo analyses were conducted to estimate the rms deviations in final parameters arising from the noise in the data. Two consecutive sets of  $16 \times 16$  Monte-Carlo cycles were calculated and the resulting rms errors were combined with systematic errors to determine the final error estimates. The probable errors in the Au-C and Au•••Au bond lengths were estimated as  $[\sigma_r^2 + \sigma_s^2]^{1/2}$ , where  $\sigma_r$  and  $\sigma_s$  represent contributions from the random and systematic errors, respectively. The random (statistical) errors due to noise in the data were estimated by Monte Carlo calculations,<sup>3</sup> and the systematic errors were assigned a conservative consensus value,  $0.02 \text{ \AA}$ .<sup>5</sup>

The following applies to tables of multiple scattering pathways presented in the supporting information: <sup>a</sup>The number of legs represents the path travelled by the photoelectron originating from and returning to the XAFS absorber Au(0). <sup>b</sup>The total distance travelled by the photoelectron ( $R_{\text{eff}}$ ) is twice the value of  $R_{\text{as}}$ . <sup>c</sup>The importance factor (given to 2 d.p.), represents the percent contribution of a path relative to the strongest path Au(0) → C(1) → Au(0), including contribution from the Debye-Waller Factors. All pathways have a maximum of 5 legs per MS pathway, curve and plane wave filters of 3% and 2%, respectively,  $R_{\text{eff}} \leq 10$  Å.

**Table S2** Paths and importance factors from MS analysis (Table 1), for the MS refinement of the EXAFS of 1.(PF<sub>6</sub>)<sub>2</sub>.

| Atoms in MS Pathway                       | Legs <sup>a</sup> | Deg | $R_{\text{as}}$ (Å) <sup>b</sup> | Importance Factor <sup>c</sup> |
|-------------------------------------------|-------------------|-----|----------------------------------|--------------------------------|
| Au(0) → C(1) → Au(0)                      | 2                 | 2   | 2.03                             | 100.00%                        |
| Au(0) → Au(3) → Au(0)                     | 2                 | 1   | 3.02                             | 20.45%                         |
| Au(0) → N(4) → Au(0)                      | 2                 | 4   | 3.06                             | 100.00%                        |
| Au(0) → N(6) → C(2) → Au(0)               | 3                 | 8   | 3.23                             | 100.00%                        |
| Au(0) → C(2) → N(6) → C(2) → Au(0)        | 4                 | 4   | 3.40                             | 30.40%                         |
| Au(0) → C(2) → C(1) → Au(0)               | 3                 | 2   | 4.06                             | 17.00%                         |
| Au(0) → C(1) → Au(0) → C(2) → Au(0)       | 4                 | 2   | 4.06                             | 32.47%                         |
| Au(0) → C(1) → Au(0) → C(1) → Au(0)       | 4                 | 2   | 4.06                             | 9.57%                          |
| Au(0) → N(4) → N(5) → Au(0)               | 3                 | 4   | 4.16                             | 6.03%                          |
| Au(0) → C(10) → Au(0)                     | 2                 | 4   | 4.25                             | 28.73%                         |
| Au(0) → C(9) → C(1) → Au(0)               | 3                 | 8   | 4.28                             | 64.64%                         |
| Au(0) → C(2) → N(6) → N(7) → Au(0)        | 4                 | 8   | 4.33                             | 21.17%                         |
| Au(0) → C(1) → C(9) → C(1)                | 3                 | 4   | 4.30                             | 42.92%                         |
| Au(0) → C(10) → N(7) → Au(0)              | 3                 | 8   | 4.36                             | 43.09%                         |
| Au(0) → N(4) → C(8) → C(1) → Au(0)        | 4                 | 8   | 4.38                             | 55.71%                         |
| Au(0) → N(7) → C(2) → N(7) → Au(0)        | 4                 | 4   | 4.43                             | 24.06%                         |
| Au(0) → N(5) → C(1) → N(4) → Au(0)        | 4                 | 4   | 4.43                             | 5.63%                          |
| Au(0) → C(1) → N(4) → N(5) → C(1) → Au(0) | 5                 | 4   | 4.50                             | 11.14%                         |
| Au(0) → N(6) → C(11) → N(6) → Au(0)       | 4                 | 4   | 4.46                             | 22.57%                         |
| Au(0) → C(8) → N(4) → C(1) → Au(0)        | 4                 | 8   | 4.53                             | 39.22%                         |
| Au(0) → C(1) → C(9) → N(5) → C(1) → Au(0) | 5                 | 8   | 4.55                             | 41.91%                         |
| Au(0) → C(1) → N(4) → C(1) → N(5) → Au(0) | 5                 | 8   | 4.60                             | 12.52%                         |
| Au(0) → N(4) → C(1) → N(4) → C(1) → Au(0) | 5                 | 8   | 4.60                             | 28.98%                         |
| Au(0) → N(5) → C(9) → N(5) → C(1) → Au(0) | 5                 | 8   | 4.63                             | 36.46%                         |
| Au(0) → C(9) → N(4) → Au(0)               | 3                 | 8   | 4.77                             | 9.88%                          |
| Au(0) → C(2) → C(11) → N(7) → Au(0)       | 4                 | 8   | 4.79                             | 10.43%                         |
| Au(0) → N(7) → C(10) → N(6) → Au(0)       | 4                 | 8   | 4.87                             | 4.55%                          |
| Au(0) → C(9) → C(8) → Au(0)               | 3                 | 4   | 4.92                             | 5.45%                          |
| Au(0) → C(8) → N(5) → C(1) → Au(0)        | 4                 | 8   | 4.94                             | 11.53%                         |
| Au(0) → C(11) → C(10) → C(2) → Au(0)      | 4                 | 8   | 4.95                             | 13.32%                         |

[1](PF<sub>6</sub>)<sub>2</sub>

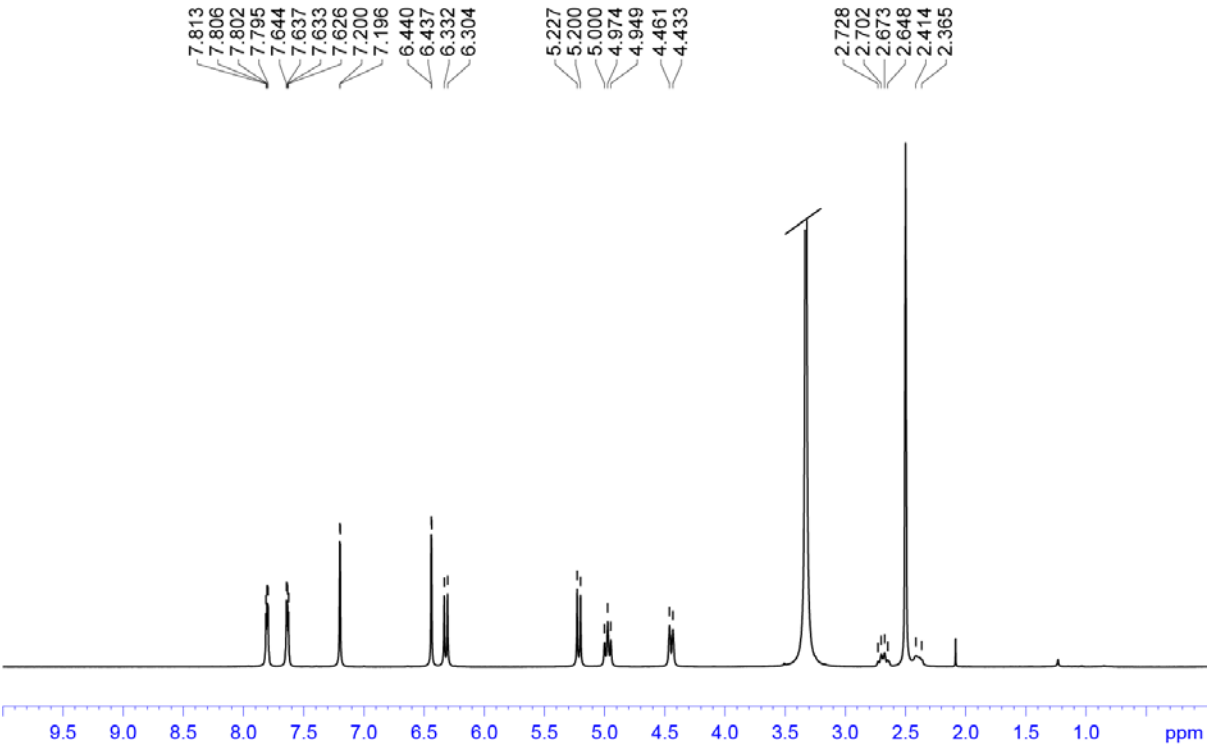

<sup>1</sup>H NMR Spectrum of [1](PF<sub>6</sub>)<sub>2</sub> in d<sub>6</sub>-DMSO

## References

1. N. Binsted, R. W. Strange and S. S. Hasnain, *Biochemistry*, 1992, **31**, 12117-12125.
2. A. Levina, R. S. Armstrong and P. A. Lay, *Coord. Chem. Rev.*, 2005, **249**, 141-160.
3. P. J. Ellis and H. C. Freeman, *J. Synchrotron Radiat.*, 1995, **2**, 190-195.
4. A. M. Rich, R. S. Armstrong, P. J. Ellis, H. C. Freeman and P. A. Lay, *Inorg. Chem.*, 1998, **37**, 5743-5753.
5. S. J. Gurman, *J. Synchrotron Radiat.*, 1995, **2**, 56-63.
